# Supplementary material for: AAV‐Mediated Gene Therapy Restores Hearing in Patients with DFNB9 Deafness
Source: PubMed Central journal article supplement (PMC10953563; doi:10.1002/advs.202306788), 2024-01-08
Supplement: ADVS-11-2306788-s002.pdf [file ADVS-11-2306788-s002.pdf]

## Supporting Information

for *Adv. Sci.*, DOI 10.1002/adv.202306788

AAV-Mediated Gene Therapy Restores Hearing in Patients with DFNB9 Deafness

*Jieyu Qi, Fangzhi Tan, Liyan Zhang, Ling Lu, Shanzhong Zhang, Yabo Zhai, Yicheng Lu, Xiaoyun Qian, WenXiu Dong, Yinyi Zhou, Ziyu Zhang, Xuehan Yang, Lulu Jiang, Chaorong Yu, Jiancheng Liu, Tian Chen, Lianqiu Wu, Chang Tan, Sijie Sun, Huaien Song, Yilai Shu\*, Lei Xu\*, Xia Gao\*, Huawei Li\* and Renjie Chai\**

## Supplementary materials for

### AAV-mediated gene therapy restores hearing in patients with DFNB9 deafness

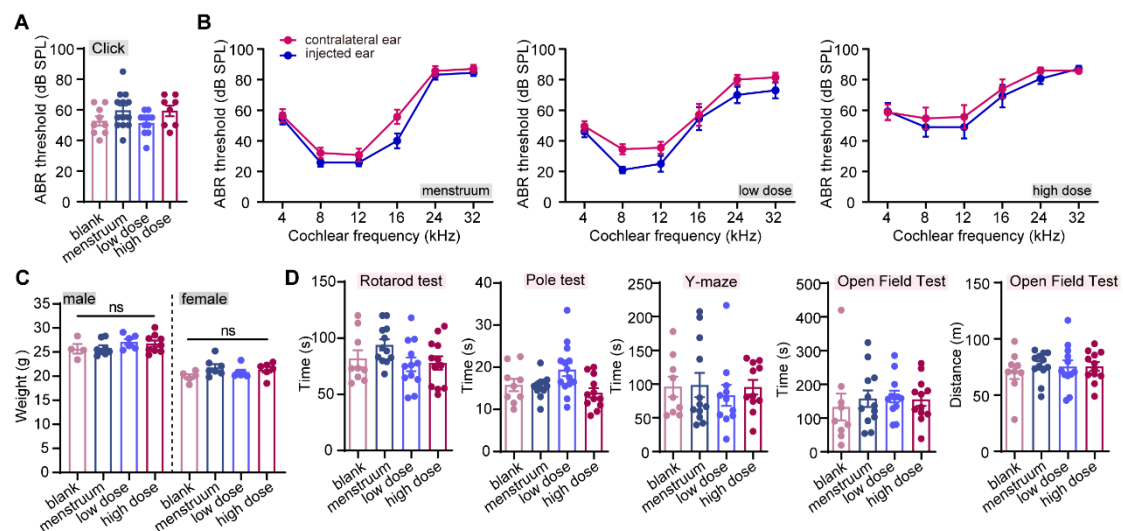

**Figure S1. AAV-OTOF had no adverse effect in adult WT mice.**

(A-B) Click and tone-burst ABRs of adult WT mice and WT mice injected with menstruum, low dose AAV-OTOF, and high dose AAV-OTOF at 3 months after injection. (C) The body weight of adult WT mice and WT mice injected with menstruum and virus at 3 months after injection. (D) Behavior tests from WT mice and WT mice injected with virus at 3 months after injection. Error bars indicate the standard error of the mean. The  $p$ -value was calculated by Student's  $t$ -test or one-way ANOVA. n.s. means no significant difference.

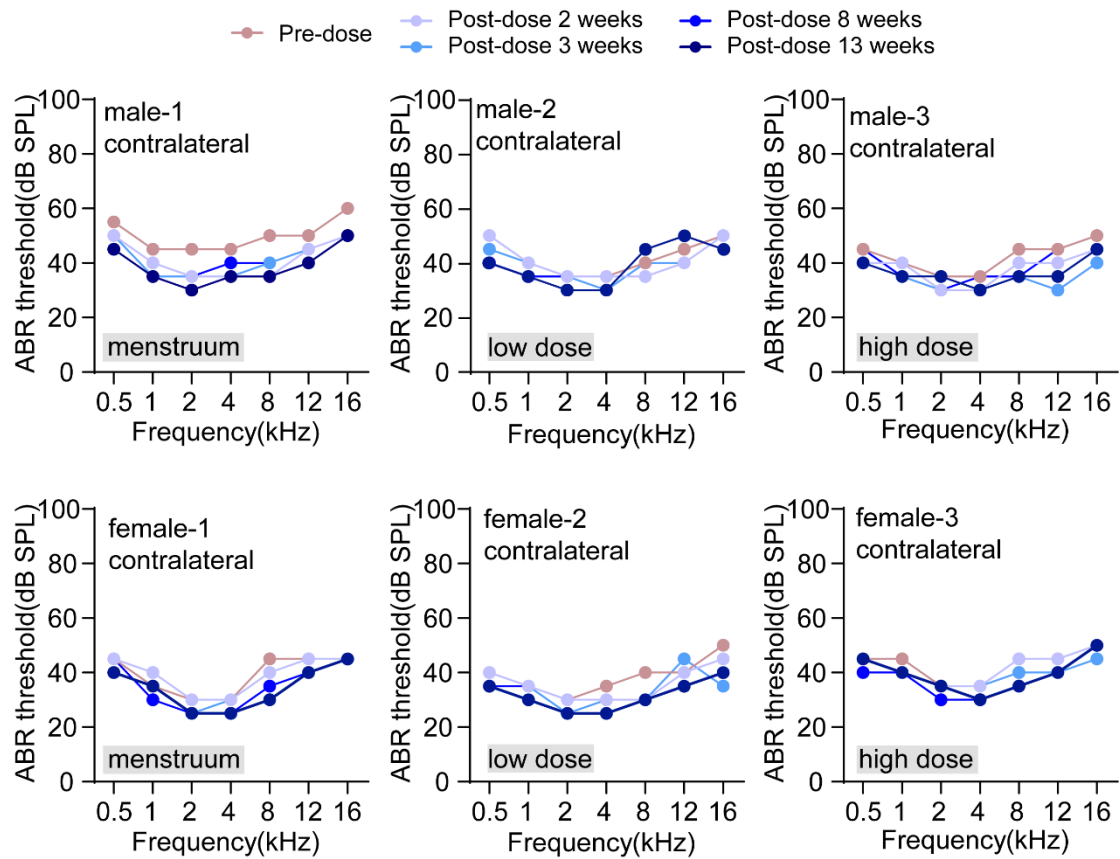

**Figure S2. AAV-OTOF was safe for the auditory system in the contralateral ear of cynomolgus macaques.** The ABR results for the contralateral ear in cynomolgus macaques injected with menstruum, low dose AAV-OTOF, or high dose AAV-OTOF at 2 weeks, 3 weeks, 8 weeks, and 13 weeks after injection, respectively.

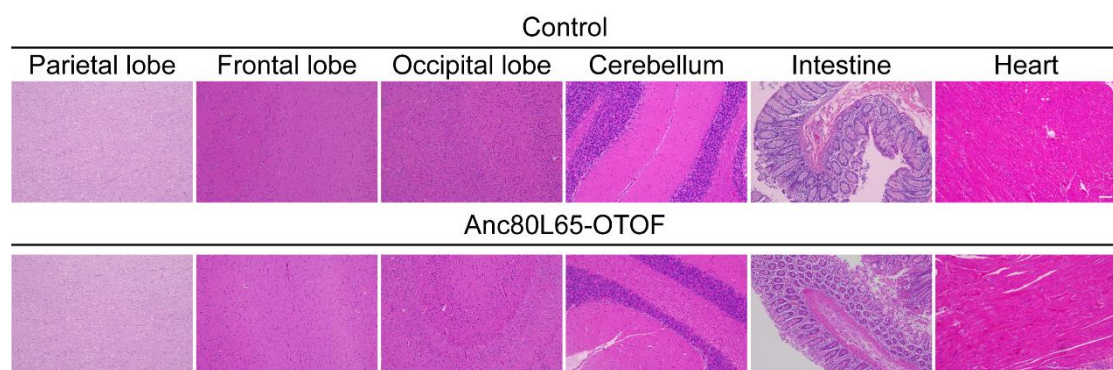

**Figure S3. AAV-OTOF had no impact on the tissues of cynomolgus macaques.** The HE staining of tissues from control or AAV-OTOF injected cynomolgus macaques. Scale bar: 100  $\mu$ m.

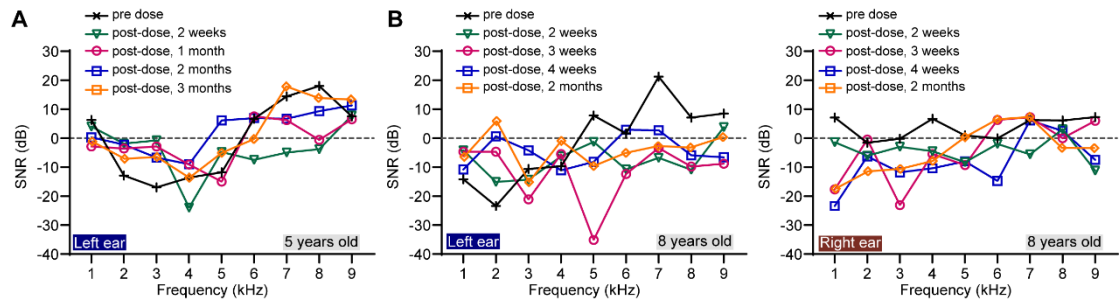

**Figure S4. DPOAE results of the two patients before and after AAV-OTOF injection.**

DPOAE results of AAV-OTOF injected ears from the 5-year-old patient (A) and 8-year-old patient (B).

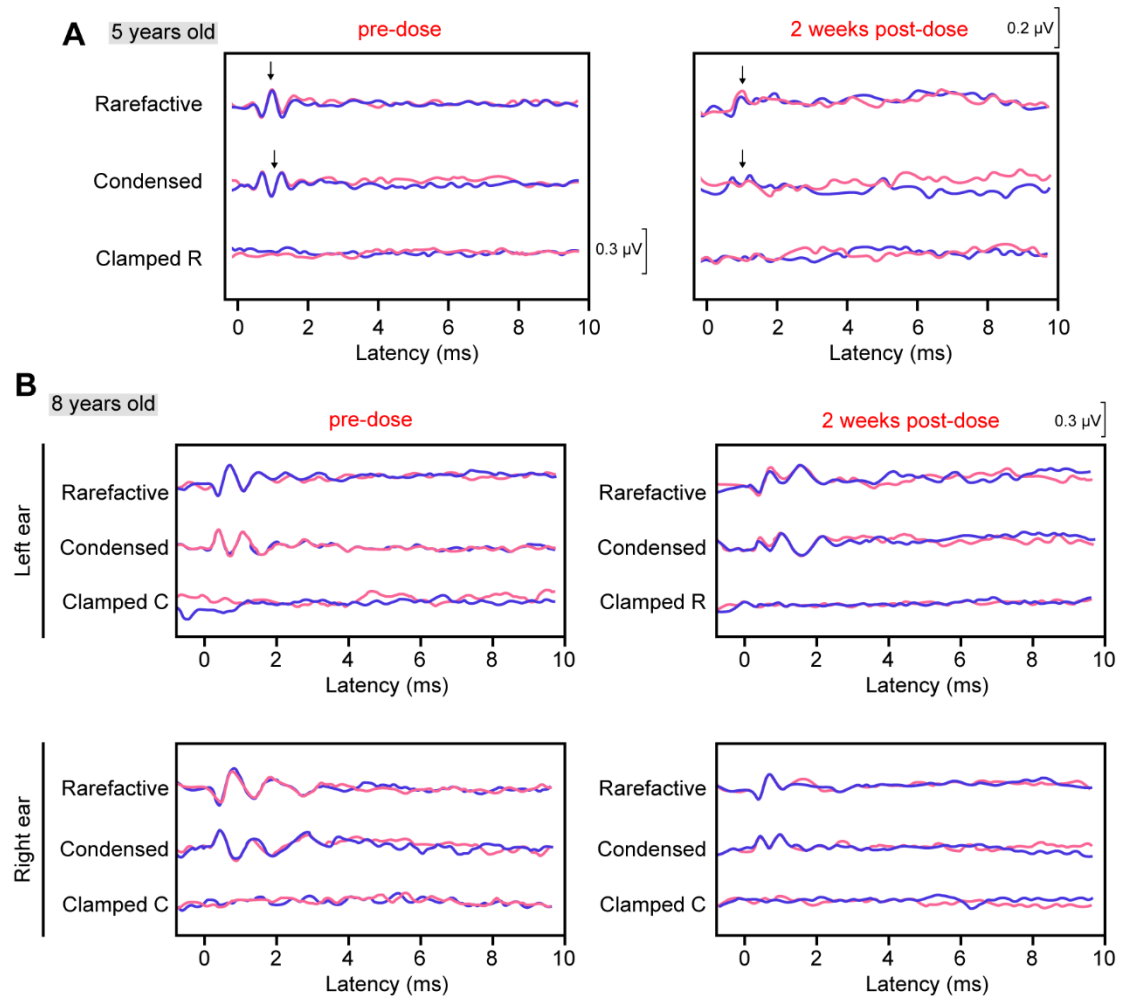

**Figure S5. CM results of the two patients after AAV-OTOF injection at 2 weeks.**

Click CM results of AAV-OTOF injected ears from the 5-year-old patient (A) and 8-year-old patient (B). The recording was made twice at each sound intensity.

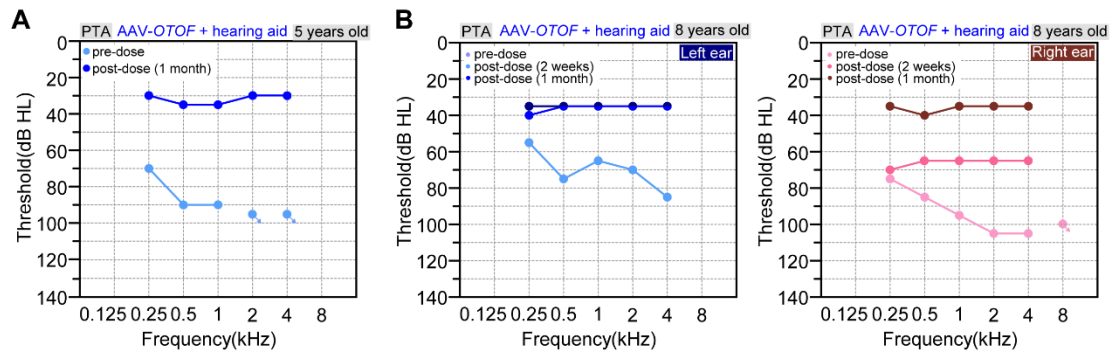

**Figure S6. PTA results of the patients with a hearing-aid after AAV-OTOF injection.** The PTA thresholds of the injected ears with hearing aid from the 5-year-old patient (**A**) and 8-year-old patient (**B**). The arrows indicate that the patient had no responses to the maximum sound intensity at each frequency.

**Movie S1. AAV injection in NHPs.**

**Movie S2. AAV injection in the patient.**

**Movie S3. Talk to the patient 2 months after AAV injection.**

Here is the description of the movie:

Time: 00:10-01:15

Closed the CI.

Time: 00:23-00:27

The mother asked her daughter (patient) to say the color of the purple rabbit doll, and the daughter answered purple.

Time: 00:40-01:54

The mother asked her daughter (patient) to point out the rabbit's ears, eyes and nose, and the daughter correctly pointed out the position of the rabbit's ears, eyes and nose and responded accordingly.

**Table S1. Quantification of genomic DNA of AAV-*OTOF* in the blood and tissues of AAV-*OTOF*-injected mice.**

| Time | Sex    | Group     | Animal IDs/Tissues | The number of <i>OTOF</i> -N copies/ $\mu$ g |            |             |              |               |           |                      |          |          |          |          |     |
|------|--------|-----------|--------------------|----------------------------------------------|------------|-------------|--------------|---------------|-----------|----------------------|----------|----------|----------|----------|-----|
|      |        |           |                    | Whole blood                                  | Left brain | Right brain | Left cochlea | Right cochlea | Brainstem | Cervical lymph nodes | Heart    | Kidney   | Liver    | Lung     |     |
| D49  | male   | low dose  | 1-1-1              | BQL                                          | BQL        | BQL         | 6.07E+03     | BQL           | BQL       | BQL                  | BQL      | BQL      | BQL      | 6.13E+02 | BQL |
|      |        |           | 1-1-2              | BQL                                          | BQL        | BQL         | 2.53E+04     | BQL           | BQL       | 3.24E+02             | BQL      | BQL      | BQL      | 2.63E+03 | BQL |
|      |        | high dose | 1-2-1              | BQL                                          | 1.70E+02   | BQL         | 8.99E+03     | BQL           | 4.20E+02  | BQL                  | BQL      | BQL      | BQL      | 1.90E+04 | BQL |
|      |        |           | 1-2-1              | BQL                                          | BQL        | 3.35E+02    | 1.87E+04     | 6.45E+02      | 9.86E+02  | 3.79E+03             | 9.96E+01 | 8.33E+01 | 7.64E+04 | 5.27E+01 |     |
|      | female | low dose  | 2-1-1              | BQL                                          | BQL        | BQL         | 6.12E+02     | BQL           | 1.20E+02  | 3.76E+01             | BQL      | BQL      | 1.51E+03 | BQL      |     |
|      |        |           | 2-1-2              | BQL                                          | BQL        | BQL         | 3.77E+01     | 9.55E+01      | 4.77E+02  | 4.00E+02             | BQL      | BQL      | 9.53E+03 | BQL      |     |
|      |        | high dose | 2-2-1              | BQL                                          | 1.00E+03   | 1.56E+03    | 7.09E+04     | 1.79E+03      | 9.91E+02  | 6.00E+01             | 5.47E+01 | 3.33E+01 | 2.66E+04 | BQL      |     |
|      |        |           | 2-2-2              | BQL                                          | 1.48E+02   | BQL         | 2.28E+04     | 6.14E+02      | 4.93E+02  | 1.28E+04             | BQL      | BQL      | 1.88E+04 | BQL      |     |
| D92  | male   | low dose  | 3-1-1              | BQL                                          | BQL        | BQL         | 1.57E+04     | 1.03E+01      | BQL       | 7.16E+01             | BQL      | BQL      | 3.06E+03 | BQL      |     |
|      |        |           | 3-1-2              | BQL                                          | 8.30E+02   | BQL         | 8.95E+03     | 2.74E+01      | BQL       | 5.80E+01             | BQL      | BQL      | 6.16E+03 | BQL      |     |
|      |        | high dose | 3-2-1              | BQL                                          | BQL        | 8.22E+01    | 9.28E+04     | 1.50E+03      | 1.27E+03  | 2.45E+02             | 4.18E+02 | BQL      | 6.98E+04 | 4.97E+01 |     |
|      |        |           | 3-2-2              | BQL                                          | 3.59E+03   | 1.11E+02    | 4.68E+03     | 4.59E+03      | 1.88E+03  | 6.34E+02             | 2.93E+01 | 2.36E+01 | 5.74E+04 | BQL      |     |
|      | female | low dose  | 4-1-1              | BQL                                          | BQL        | BQL         | 1.86E+03     | BQL           | 3.19E+02  | 6.06E+02             | BQL      | BQL      | 1.51E+03 | BQL      |     |
|      |        |           | 4-1-2              | BQL                                          | BQL        | 4.12E+02    | 1.10E+04     | 2.73E+02      | 1.89E+03  | 9.30E+02             | BQL      | BQL      | 2.47E+03 | BQL      |     |
|      |        | high dose | 4-2-1              | BQL                                          | 2.96E+03   | 3.09E+03    | 1.67E+04     | 8.79E+02      | 2.19E+04  | 3.79E+04             | 2.41E+02 | 9.88E+01 | 8.73E+04 | 1.28E+02 |     |
|      |        |           | 4-2-2              | BQL                                          | 1.33E+02   | 1.26E+02    | 6.19E+03     | 7.82E+02      | 6.88E+02  | 1.75E+03             | BQL      | BQL      | 1.80E+04 | 3.31E+01 |     |

| Time | Sex  | Group    | Animal IDs/Tissues | The number of <i>OTOF</i> -C copies/ $\mu$ g |            |             |              |               |           |                      |       |        |       |          |     |
|------|------|----------|--------------------|----------------------------------------------|------------|-------------|--------------|---------------|-----------|----------------------|-------|--------|-------|----------|-----|
|      |      |          |                    | Whole blood                                  | Left brain | Right brain | Left cochlea | Right cochlea | Brainstem | Cervical lymph nodes | Heart | Kidney | Liver | Lung     |     |
| D49  | male | low dose | 1-1-1              | BQL                                          | BQL        | BQL         | 8.01E+03     | BQL           | BQL       | BQL                  | BQL   | BQL    | BQL   | 5.97E+02 | BQL |

| Time      | Sex       | Group     | Animal IDs/Tissues | The number of <i>OTOF-C</i> copies/ $\mu$ g |            |             |              |               |           |                      |          |          |          |          |
|-----------|-----------|-----------|--------------------|---------------------------------------------|------------|-------------|--------------|---------------|-----------|----------------------|----------|----------|----------|----------|
|           |           |           |                    | Whole blood                                 | Left brain | Right brain | Left cochlea | Right cochlea | Brainstem | Cervical lymph nodes | Heart    | Kidney   | Liver    | Lung     |
|           |           |           | 1-1-2              | BQL                                         | 1.09E+02   | BQL         | 2.60E+04     | BQL           | BQL       | 2.24E+02             | BQL      | BQL      | 2.75E+03 | BQL      |
|           |           |           | 1-2-1              | BQL                                         | 2.91E+02   | BQL         | 1.30E+04     | 1.96E+02      | 6.56E+02  | BQL                  | BQL      | 3.89E+01 | 2.07E+04 | BQL      |
|           |           | high dose | 1-2-1              | 6.75E+02                                    | BQL        | 4.67E+02    | 2.09E+04     | 8.63E+02      | 1.29E+03  | 2.61E+03             | 2.28E+02 | 1.44E+02 | 6.95E+04 | 8.04E+01 |
|           |           | low dose  | 2-1-1              | BQL                                         | BQL        | BQL         | 6.93E+02     | BQL           | 1.90E+02  | 3.81E+01             | BQL      | BQL      | 1.90E+03 | BQL      |
|           | female    | low dose  | 2-1-2              | BQL                                         | BQL        | BQL         | BQL          | 1.12E+02      | 6.28E+02  | 2.76E+02             | BQL      | BQL      | 9.37E+03 | BQL      |
|           |           |           | high dose          | 2-2-1                                       | BQL        | 1.40E+03    | 1.87E+03     | 8.87E+04      | 2.74E+03  | 1.78E+03             | 4.98E+01 | 9.29E+01 | 8.35E+01 | 4.23E+04 |
|           |           | high dose | 2-2-2              | BQL                                         | 2.87E+02   | BQL         | 2.94E+04     | 8.49E+02      | 8.44E+02  | 1.05E+04             | BQL      | BQL      | 2.78E+04 | BQL      |
|           |           |           | D92                | male                                        | low dose   | 3-1-1       | BQL          | BQL           | BQL       | 1.32E+04             | 9.45E+00 | BQL      | 3.67E+01 | BQL      |
| 3-1-2     | BQL       | 6.81E+02  |                    |                                             | BQL        | 5.72E+03    | 3.75E+01     | BQL           | 7.20E+01  | BQL                  | BQL      | 3.69E+03 | BQL      |          |
| high dose | 3-2-1     | BQL       |                    | BQL                                         | 6.92E+01   | 8.05E+04    | 1.61E+03     | 1.26E+03      | 1.40E+02  | 3.61E+02             | 5.09E+01 | 6.52E+04 | 4.30E+01 |          |
|           | 3-2-2     | BQL       |                    | 3.82E+03                                    | 1.22E+02   | 3.20E+03    | 6.95E+03     | 2.21E+03      | 3.20E+02  | 3.90E+01             | 2.25E+01 | 4.38E+04 | 4.45E+01 |          |
| female    | low dose  | 4-1-1     | BQL                | BQL                                         | BQL        | 1.09E+03    | BQL          | 3.38E+02      | 3.87E+02  | BQL                  | BQL      | 1.50E+03 | BQL      |          |
|           |           | 4-1-2     | BQL                | BQL                                         | 4.57E+02   | 9.38E+03    | 2.16E+02     | 2.03E+03      | 1.06E+03  | BQL                  | BQL      | 1.83E+03 | BQL      |          |
|           | high dose | 4-2-1     | BQL                | 2.70E+03                                    | 2.77E+03   | 1.55E+04    | 7.79E+02     | 2.21E+04      | 2.87E+04  | 3.08E+02             | 9.18E+01 | 7.40E+04 | 1.04E+02 |          |
|           |           | 4-2-2     | BQL                | 1.52E+02                                    | 1.08E+02   | 5.71E+03    | 7.67E+02     | 6.56E+02      | 7.64E+02  | BQL                  | BQL      | 1.96E+04 | 3.87E+01 |          |

BQL: below the quantification limit (50 copies/ $\mu$ g)

**Table S2. Quantification of the genomic DNA of AAV-*OTOF* in the blood of cynomolgus macaques.**

| <i>OTOF-N</i> copies/ $\mu$ g |        |          |          |          |     |     |     |     |     |     |
|-------------------------------|--------|----------|----------|----------|-----|-----|-----|-----|-----|-----|
| Group                         | Gender | No./time | Blood    |          |     |     |     |     |     |     |
|                               |        |          | pre-dose | D1       | D4  | D8  | D15 | D29 | D57 | D92 |
| menstruum                     | male   | 2345721  | BQL      | BQL      | BQL | BQL | BQL | BQL | BQL | BQL |
|                               | female | 2345722  | BQL      | BQL      | BQL | BQL | BQL | BQL | BQL | BQL |
| low dose                      | male   | 2345723  | BQL      | 6.87E+01 | BQL | BQL | BQL | BQL | BQL | BQL |
|                               | female | 2345724  | BQL      | 2.36E+02 | BQL | BQL | BQL | BQL | BQL | BQL |

|           |        |         |     |          |          |     |     |     |     |     |
|-----------|--------|---------|-----|----------|----------|-----|-----|-----|-----|-----|
| high dose | male   | 2345725 | BQL | 5.84E+05 | 3.35E+03 | BQL | BQL | BQL | BQL | BQL |
|           | female | 2345726 | BQL | 9.50E+02 | BQL      | BQL | BQL | BQL | BQL | BQL |

| <i>OTOF-C</i> copies/ $\mu$ g |        |          |          |          |          |     |     |     |     |     |
|-------------------------------|--------|----------|----------|----------|----------|-----|-----|-----|-----|-----|
| Group                         | Gender | No./time | Blood    |          |          |     |     |     |     |     |
|                               |        |          | pre-dose | D1       | D4       | D8  | D15 | D29 | D57 | D92 |
| menstruum                     | male   | 2345721  | BQL      | BQL      | BQL      | BQL | BQL | BQL | BQL | BQL |
|                               | female | 2345722  | BQL      | BQL      | BQL      | BQL | BQL | BQL | BQL | BQL |
| low dose                      | male   | 2345723  | BQL      | 7.57E+01 | BQL      | BQL | BQL | BQL | BQL | BQL |
|                               | female | 2345724  | BQL      | 2.99E+02 | BQL      | BQL | BQL | BQL | BQL | BQL |
| high dose                     | male   | 2345725  | BQL      | 4.40E+05 | 2.93E+03 | BQL | BQL | BQL | BQL | BQL |
|                               | female | 2345726  | BQL      | 1.05E+03 | BQL      | BQL | BQL | BQL | BQL | BQL |

BQL: below the quantification limit (50 copies/ $\mu$ g).
